# Supplementary material
Source: ML conference proceedings conference paper supplement (https://openreview.net/forum?id=lB8YNp1YWv)
Supplement: supplementary_material [file Strategic_Cost_Selection_in_Participatory_Budgeting SUPPLEMENTARY.pdf › Strategic_Cost_Selection_in_Participatory_Budgeting SUPPLEMENTARY.pdf]

## A Games with Preference for Funding

A PB game with preference for funding (PB/P4F game) is a standard PB game where instead of our standard utility functions we use the extended ones, as defined in Remark 3.1:

$$u'_i(\mathbf{c}) = \begin{cases} c(p_i) - d(p_i) + \mathbb{1}[c(p_i) \geq d(p_i)] & \text{if } p_i \in f(E(\mathbf{c})), \\ 0 & \text{otherwise,} \end{cases}$$

where  $\mathbb{1}[x]$  is 1 if  $x$  holds and 0 otherwise.

All our NE-(non)existence results for PB games translate to PB/P4F games. Indeed, if a PB game does not admit an equilibrium then neither does its P4F variant (every profitable deviation in a PB game is also profitable in the corresponding P4F game). The other direction is more involved as there are games that have equilibria in our model but do not have them in the P4F variant (see Example A.1). However, if a PB game has an NE where all projects that report values above their delivery costs are funded, then it remains an NE in the corresponding P4F game (a profitable deviation for the P4F game would also be profitable in the original one). All our existence results produce equilibria that satisfy this condition.

**Example A.1.** Consider three projects  $p_1, p_2, p_3$ , each supported by one distinct voter, with delivery costs  $d_1 = 1, d_2 = d_3 = 0$ , tie-breaking order  $p_1 \succ p_2 \succ p_3$  and budget  $B = 2$ . As we prove in the appendix, the corresponding PB game admits Phragmén-NE  $\mathbf{c} = (2, 1, 1)$  but the corresponding P4F PB game has no NEs under Phragmén.

Below we argue why the statement from the above example indeed holds. Let us denote the PB game from the example as  $G$  and the P4F PB game as  $G'$ . Using  $G$  and  $G'$ , we show now that in some cases PB games admit a Phragmén-NE, while PB/P4F games (based on the same input) do not.

First, observe that  $\mathbf{c} = (2, 1, 1)$  is a Phragmén-NE in PB games. To see that, suppose that it is not and consider a project  $p_i$  and a cost  $c'_i$  for which  $u_i((\mathbf{c}_{-i}, c'_i)) > u_i(\mathbf{c})$ . If  $p_i$  is  $p_2$  or  $p_3$ , we notice that  $p_i$  is selected under  $\mathbf{c}$  but not under  $(\mathbf{c}_{-i}, c'_i)$ , for each  $c'_i > c_i$ . So, neither  $p_2$  nor  $p_3$  can improve its utility. For  $p_i = p_1$ , we notice that it is not funded under  $\mathbf{c}$  and that it can only be funded if  $c'_i \leq 1$ . But then  $u_i((\mathbf{c}_{-i}, c'_i)) \leq 0$ . It follows that  $\mathbf{c}$  is a Phragmén-NE in PB games.

Second, we show that  $G'$  does not admit a Phragmén-NE. For contradiction, suppose that  $G'$  admits a Phragmén-NE, say  $\mathbf{c}$ , for PB/P4F games. As a warm up, we note that at least one project has to be chosen in  $E(\mathbf{c})$ , as otherwise each project benefits from lowering their cost to  $B = 2$ .

Further, consider the case that in  $\mathbf{c}$  projects have the same cost  $c$ . If  $c < 1$ , then, following the tie-breaking order,  $p_1$  is funded and gets a negative utility. Hence, by increasing its cost to  $c' > B > c$ ,  $p_1$  becomes not funded and increases its utility. Also, if  $c \geq 1$ , then  $p_3$  is not funded, and as  $d_3 = 0$ , it can benefit from decreasing its cost.

Now, suppose that in  $\mathbf{c}$  projects do not have the same costs. Let  $c_1 \geq 1$ . Then, if  $c_2 \geq c_1$  or  $c_3 \geq c_1$ , then some project that is not funded would benefit from lowering its cost. For a complementary case of  $c_2 < c_1$  and  $c_3 < c_1$ , we further consider two subcases. If  $c_2 + c_3 < 2$ , then one of  $p_2$  and  $p_3$  would benefit from increasing their cost. Alternatively,  $c_2 + c_3 \geq 2$ . This implies that  $c_1 > 1$  and that  $c_2 \geq 1$  or  $c_3 \geq 1$ . In this case  $p_1$  would benefit, in a PB/P4F game, from choosing  $c'_1 = 1$  and becoming selected.

Finally, if  $c_1 < 1$ , then it benefits from increasing its cost if it is funded under  $\mathbf{c}$ . Notice further that if it would not be funded, then  $c_2 < 1$  and  $c_3 < 1$ , and both of these costs are lower than  $c_1$ . It follows that one of them can increase its utility by increasing its cost.

As our case distinction is exhaustive, we know that there is no Phragmén-NE for  $G'$ . Consequently, we proved our claim about the equilibria in games  $G$  and  $G'$ .

## B Missing Proofs

### B.1 Proof of Proposition 4.1

*Proof.* Take a PB game and a strategy profile  $\mathbf{c}$  as described in the statement, and let  $p$  be the project such that  $\mathbf{c}(p) = B$ . If a project other than  $p$  increases its cost, it still is not selected so this is not a

beneficial move. If  $p$  decreases its cost then its utility drops, and if it increases its cost then it is not funded. In either case, its utility decreases. So,  $\mathbf{c}$  is a BasicAV-NE.  $\square$

## B.2 Proof of Proposition 4.2

In our proof we first use the following proposition.

**Proposition B.1.** *Take a PB game and the corresponding strategy profile  $\mathbf{ap}$ . If  $d(p) \leq \mathbf{ap}(p)$  for each project  $p$ , then if a profile  $\mathbf{c}$  is an AV/Cost-NE for this game, then (1)  $\sum_{p \in P} \mathbf{c}(p) = B$ , and (2) AV/Cost funds all the projects.*

*Proof.* Let the notation be as in the statement of the proposition. In the beginning we observe that if  $\sum_{p \in P} \mathbf{c}(p) < B$ , then AV/Cost selects all the projects. Hence, the project considered last benefits by reporting a higher cost (so that the sum of the reported costs is  $B$ ). Thus such a strategy profile  $\mathbf{c}$  is not an equilibrium.

Next, let us assume that  $\sum_{p \in P} \mathbf{c}(p) > B$ . Let  $P_{won}$  and  $P_{lost}$  be sets of projects that, respectively, are and are not funded. By our assumption, we know that  $P_{lost}$  must be nonempty, and we also note that  $P_{won}$  must be nonempty. Naturally,  $\sum_{p \in P_{won}} \mathbf{c}(p) \leq B$ . For each two projects  $p_i$  and  $p_j$  in  $P_{won}$ , it must be the case that  $|A(p_i)|/\mathbf{c}(p_i) = |A(p_j)|/\mathbf{c}(p_j)$ . For example, if we had  $|A(p_i)|/\mathbf{c}(p_i) > |A(p_j)|/\mathbf{c}(p_j)$  then AV/Cost would consider  $p_i$  prior to  $p_j$  and, consequently, it would be beneficial for  $p_i$  to increase its reported cost by a small-enough amount so that it would still be considered (and selected) prior to  $p_j$ . This would contradict the assumption that  $\mathbf{c}$  is an equilibrium. Next, since  $\sum_{p \in P} \mathbf{ap}(p) = B$ , there must be some project  $p'$  in  $P_{won}$  such that  $\mathbf{c}(p') > \mathbf{ap}(p') \geq d(p')$  (otherwise, if each project  $p' \in P_{won}$  reported at most  $\mathbf{ap}(p')$ , then any project  $p \in P_{lost}$  would be selected after reducing its cost to  $\mathbf{ap}(p)$ , so  $\mathbf{c}$  could not have been NE). Further, by definition of the approval-proportional profile, for every project  $p \in P$ , we have that  $|A(p)|/\mathbf{ap}(p)$  is the same value and, so, for every project  $q \in P_{lost}$  it holds that  $|A(q)|/\mathbf{ap}(q) = |A(p')|/\mathbf{ap}(p') > |A(p')|/\mathbf{c}(p')$ . This means that every project  $q \in P_{lost}$  can improve its utility by reporting cost  $\mathbf{ap}(q)$  and being selected. This contradicts the assumption that  $\mathbf{c}$  is an equilibrium.

Thus it must be the case that  $\sum_{p \in P} \mathbf{c}(p) = B$ , which implies that AV/Cost selects all projects.  $\square$

*Proof of Proposition 4.2.* Consider a PB game  $(P, V, B, d)$  such that for every  $p_i \in P$  it is true that  $d(p) \leq \mathbf{ap}(p)$ .

We argue that strategy  $\mathbf{c} = \mathbf{ap}$  is a AV/Cost-NE. Note that the sum of the reported costs in  $\mathbf{c}$  is exactly  $B$  and all projects are funded. Hence, for each player, decreasing the cost leads to a utility loss. Hence, a profitable deviation could only be through increasing the reported cost. Towards contradiction, let us fix some player  $p_i \in \mathbf{ap}$  and assume that reporting a cost  $c'_i > c_i$  leads to a better payoff. This means that  $p_i$  is funded in the modified election  $E' = (P, V, B, (\mathbf{c}_{-i}, c'_i))$ , that is,  $p_i \in \text{AV/cost}(E')$ . Additionally, since by Proposition B.1 we know that  $\sum_{j \in |P|} c_j = B$ , it immediately follows that  $c'_i + \sum_{j \in |P| \setminus \{i\}} c_j > B > \sum_{j \in |P| \setminus \{i\}} c_j$ . It is also the case that for each  $j \in |P|$ ,  $|A(p_j)|/c_j > |A(p_i)|/c'_i$ . Hence, in particular, in the run of AV/cost for  $E'$ , all projects are considered before  $p_i$ . Since all of these project are selected, by the time the procedure starts considering  $p_i$ , the remaining budget is smaller than  $c'_i$ , so  $p_i \notin \text{AV/cost}(E')$ ; a contradiction. Note that because all projects that are funded are always considered by the procedure in the same time, the result is independent of the tie-breaking order  $\succ$ .

We now argue that every strategy profile  $\mathbf{c}$  other than  $\mathbf{ap}$  is not a AV/cost-NE. To this end, we take such a profile  $\mathbf{c}$  and assume towards contradiction that it is a AV/cost-NE. Observe that since  $\mathbf{c} \neq \mathbf{ap}$ , there exist two distinct projects  $p_i$  and  $p_j$  such that  $|A(p_i)|/c_i \neq |A(p_j)|/c_j$ . Hence one of the projects is considered earlier than the other; we assume without loss of generality that  $p_i$  is considered before  $p_j$ . Notably, as  $\mathbf{c}$  is (by our assumption) a AV/cost-NE, by Proposition B.1, we know that  $\{p_i, p_j\} \subseteq \text{AV/cost}(\mathbf{c})$ . This implies, however, that  $p_i$  can report a slightly higher price  $c'_i$  and still be selected by AV/cost thus obtaining a better payoff. Formally, there exists a  $c'_i > c_i$  resulting in the profile  $(c'_i, \mathbf{c}_{-i})$  in which  $|A(p_i)|/c'_i < |A(p_j)|/c_j$ . So,  $p_i$  is (still) considered by AV/cost before  $p_j$  and the deviation is small enough (that is,  $c'_i - c_i < c_j$ ) to guarantee that  $p_i \in \text{AV/cost}((\mathbf{c}_{-i}, c'_i))$ . So,  $\mathbf{c}$  is not a AV/cost-NE; a contradiction. Again, due to Proposition B.1,

**Data:** set  $P = \{p_1, p_2, \dots, p_m\}$  of projects with the delivery costs function  $d$ , set  $V$  of voters with their ballots, budget  $B$ , A/D tie-breaking  $\succ$ .

**Result:** profile  $\mathbf{c}$  that is a AV/cost-NE under tie-breaking  $\succ$ .

```

1:  $B^* \leftarrow B$  // remaining budget
2:  $\mathbf{c} \leftarrow (d(p_1), d(p_2), \dots, d(p_m)) = \mathbf{c}_0$  // initial strategy
   // let  $t(p)$ , for each  $p \in P$ , be  $d(p)/A(p)$ 
   // note that  $\succ$  is nondecreasing w.r.t. values of  $t$ 
   //  $\text{pos}_X(i)$  denotes the top  $i$ th project of order  $\succ$  restricted to  $X \subseteq P$ 

3:  $P_p \leftarrow \{p \in P : c(p) \leq B^*\}$  // prospective projects
4: while  $P_p \neq \emptyset$  do // are there projects to consider?
5:    $P' \leftarrow P_p$  //  $P'$  is a helper variable
6:    $d(\text{pos}_{P'}(0)) \leftarrow -\inf$  // guardian "fake" value
7:    $d(\text{pos}_{P'}(|P'| + 1)) \leftarrow +\inf$  // guardian "fake" value
8:    $k \leftarrow$  maximum integer  $x \leq |P'|$  such that
      $t(\text{pos}_{P'}(x)) \sum_{i \leq x-1} A(\text{pos}_{P'}(i)) \leq B^* < t(\text{pos}_{P'}(x+1)) \sum_{i \leq x+1} A(\text{pos}_{P'}(i))$ 
9:    $T \leftarrow$  maximum  $x \leq d(\text{pos}_{P'}(k+1))/A(\text{pos}_{P'}(k+1))$ 
     such that  $x \sum_{i \in [k]} A(\text{pos}_{P'}(i)) \leq B^*$ 
10:  for  $i = 1$  to  $k$  do // update  $\mathbf{c}$  and  $B^*$ 
11:     $c(\text{pos}_{P'}(i)) \leftarrow T \cdot A(\text{pos}_{P'}(i))$ 
12:     $B^* \leftarrow B^* - c(\text{pos}_{P'}(i))$ 
13:     $P_p \leftarrow P_p \setminus \{\text{pos}_{P'}(i)\}$ 
14:  end for
15:  if  $k < |P'|$  then
16:     $P_p \leftarrow P_p \setminus \{\text{pos}_{P'}(k+1)\}$ 
17:  end if
18:   $P_p \leftarrow \{p \in P_p : c(p) \leq B^*\}$ 
19: end while
20: return  $\mathbf{c}$ 

```

**Algorithm 1:** Finding a Nash equilibrium for AV/cost.

882 in each Nash equilibrium, all projects are selected to be funded. Hence, our proof works for every  
 883 possible tie-breaking.  $\square$

### 884 B.3 Proof of Theorem 4.4

885 *Proof.* Our Algorithm 1 computes the claimed AV/Cost-NE.

886 Let us fix a PB game  $G = (P, V, B, d)$  and some corresponding A/D tie-breaking  $\succ$ , as specified in  
 887 the theorem statement. We first introduce helpful notation and discuss  $\succ$  in more detail. Then, we  
 888 proceed with presenting a high-level description of Algorithm 1 that finds the claimed AV/Cost-NE,  
 889 which we refer to as  $\mathbf{c}$ . Eventually, we prove the correctness of the algorithm using Claim 1 and  
 890 conclude with proving Claim 1 itself.

891 Recall that by definition  $\succ$  orders the projects  $p_i$  nonincreasingly according to approval-to-delivery-  
 892 cost ratios  $|A(p_i)|/d(p_i)$ . Crucially,  $\succ$  is always compatible with the order in which AV/Cost considers  
 893 the projects assuming they report their delivery costs, that is, where for all  $p_i \in P$ ,  $c(p_i) = d(p_i)$ .  
 894 In what follows, for each set of projects  $X \subseteq P$ , each  $p_i \in X$ , and the corresponding suborder  $\succ_X$   
 895 of  $\succ$ , we write  $\text{pos}_X(p_i)$  to denote the position of  $p_i$  in  $\succ_X$ . Analogously, for some natural num-  
 896 ber  $x \leq |X|$ , we denote by  $\text{top}_X(x)$  the set of top  $x$  projects according to  $\succ_X$ .

897 Algorithm 1 constructs the AV/Cost  $\mathbf{c}$  iteratively, starting from strategy  $\mathbf{c}_0$  in which each project  
 898 reports its delivery cost (Line 2). In each iteration of the while loop, the algorithm selects a group  
 899 of projects that “underreport” their costs compared to the support that they get. As the next step,  
 900 the algorithm increases the reported costs of these projects in strategy AV/Cost as much as possible  
 901 ensuring that the projects remain funded. If the funded projects after this update do not exhaust the  
 902 budget, the procedure is repeated for the remaining projects, whose prices have not been increased  
 903 so far. Such projects, albeit worse regarding the delivery-cost-to-support ratio, can still benefit from

904 the increase. The algorithm outputs  $\mathbf{c}$  if one of the updates step lead to the situation in which the  
 905 whole budget is used or when there is no more projects underreporting their costs.

906 In the following more detailed description of Algorithm 1, we use the notation as specified in the  
 907 pseudocode and whenever the value  $k$  in an iteration of the loop is smaller than  $|P'|$ , we define  $p^* =$   
 908  $\text{pos}_{P'}(k + 1)$  (assuming the value of  $P'$  from the corresponding iteration). Central to Algorithm 1  
 909 is the while loop. Importantly, due to our basic assumption on the delivery costs of the projects  
 910 (i.e., that for each  $p \in P$ ,  $d(p) \leq B$ ), initially set  $P_p$  is not empty (Line 3), so the while loop runs  
 911 at least once. Line 9 of the algorithm guarantees that in each iteration the loop sets the values of  $T$   
 912 and  $k$  to:

$$k < |P'| \text{ and } T = d(p^*)/A(p^*) \text{ or} \quad (\text{S1})$$

$$k < |P'| \text{ and } T \cdot \sum_{p_j \in \text{top}_{P'}(k)} |A(p_j)| = B^*, \text{ or} \quad (\text{S2})$$

$$k = |P'| \text{ and } T \cdot \sum_{p_j \in \text{top}_{P'}(k)} |A(p_j)| = B^*. \quad (\text{S3})$$

913 The aforementioned case distinction is crucial for the following claim.

914 **Claim 1.** *Right after executing Line 18 in each iteration of the while loop of Algorithm 1, it jointly*  
 915 *holds that:*

- 916 1. *all projects from  $\text{top}_{P'}(k)$  are funded under strategy profile  $\mathbf{c}$  and none of them has a*  
 917 *profitable deviation for  $\mathbf{c}$ ;*
- 918 2. *either  $k = |P'|$  or there exists a project  $p^* = \text{pos}_{P'}(k + 1)$  that is not funded and has no*  
 919 *profitable deviation for profile  $\mathbf{c}$ ;*
- 920 3. *no project from  $\text{top}_{P'}(k)$  has a profitable deviation for each strategy profile  $\mathbf{c}'$  that differs*  
 921 *from  $\mathbf{c}$  only by strategies of projects in  $P_p$  in a way that, for each  $p \in P_p$ ,  $\mathbf{c}'(p) \geq \mathbf{c}(p)$ ;*
- 922 4. *either  $k = |P'|$  or the project  $p^* = \text{pos}_{P'}(k + 1)$  has no profitable deviation for each*  
 923 *strategy profile  $\mathbf{c}'$  that differs from  $\mathbf{c}$  only on strategies of projects in  $P_p$  such that, for*  
 924 *each  $p \in P_p$ ,  $\mathbf{c}'(p) \geq \mathbf{c}(p)$ ;*
- 925 5. *no project in  $P \setminus P_p$  has a profitable deviation in  $\mathbf{c}$ .*

926 Note that Algorithm 1 ends when executing Line 18 makes  $P_p$  empty. So, by Item 5 of Claim 1 the  
 927 algorithm returns profile  $\mathbf{c}$  which is a Nash equilibrium. Clearly, in each iteration  $k > 0$ , so at least  
 928 one element is removed from  $P_p$  in every iteration of the loop. Consequently, the algorithm always  
 929 ends and thus it is correct. To conclude the whole proof it remains to show that Claim 1 indeed  
 930 holds.

931 *Proof of Claim 1.* We provide an inductive argument over the iterations of the while loop of Al-  
 932 gorithm 1. For the sake of the argument's simplicity, instead of thinking of AV/Cost considering  
 933 projects in nonincreasing order of approval-to-cost ratio, we say that it considers projects in nonde-  
 934 creasing order of cost-to-approval ratio. We note that these two interpretations are equivalent. We  
 935 take the first iteration of the loop as the base case and subsequently show that Items 1 to 5 hold.

936 *Item 1.* We first show that each  $p \in \text{top}_{P'}(k)$  is funded in election  $E(\mathbf{c})$ . Let us denote as  $t(p)$   
 937 the ratio  $\mathbf{c}(p)/|A(p)|$ . Due to Line 9 and the following foreach loop, we know that every project  
 938 in  $\text{top}_{P'}(k)$  is tied to be considered by AV/Cost due to the same cost-to-approval ratio  $T$ . So,  
 939 if  $k = |P'|$ , then all projects in  $P_p = P$  are tied for consideration. Since, by Line 9 all project  
 940 costs sum up to  $B^* = B$ , the claim holds. We follow assuming that  $k < |P'|$ . In this case, Line 9  
 941 shows that  $p^*$  has cost-to-approval ratio  $t(p^*) \geq T$ . Recall that  $\succ$  orders projects nondecreasingly  
 942 with respect to their cost-to-approval ratio assuming  $\mathbf{c}_0$  and that  $\mathbf{c}$  differs from  $\mathbf{c}_0$  only in strategies  
 943 of projects in  $\text{top}_{P'}(k)$ . Hence,  $p^*$  precedes in  $\mathbf{c}$  each project except of those in  $\text{top}_{P'}(k)$  and all  
 944 projects in  $\text{top}_{P'}(k)$  are considered before  $p^*$  (the latter holds even in the case of  $t(p^*) = T$  due  
 945 to  $\succ$ ). Eventually, Line 9 guarantees that the cost of all projects in  $\text{top}_{P'}(k)$  does not exceed the  
 946 budget. Knowing that, we show that no project in  $\text{top}_{P'}(k)$  has a profitable deviation in  $\mathbf{c}$ . To

947 prove it by contradiction, let us assume that some player  $p_i \in \text{top}_{P'}(k)$  has a profitable deviation  
 948 by reporting cost  $c'_i > c_i$ ; the opposite case of  $c'_i < c_i$  trivially does not yield a payoff improvement  
 949 for  $p_i$ . As a result,  $p_i$  has to be funded in the corresponding election  $E((c_{-i}, c'_i))$ . In this election,  
 950  $p_i$  has cost-to-approval ratio  $t' = c'_i/|A(p_i)| > T$ . We further split our analysis into the three cases  
 951 from Equations (S1) to (S3).

952 Assuming Equation (S1), project  $p^*$  is also funded in election  $E'$ , as it is considered before  $p_i$  due  
 953 to  $t' > T$ . Hence, the funded projects cost at least

$$T \cdot \sum_{\substack{p_j \in \text{top}_{P'}(k) \\ p_j \neq p_i}} |A(p_j)| + t'|A(p_i)| + T|A(p^*)| >$$

$$T \cdot \sum_{p_j \in \text{top}_{P'}(k+1)} |A(p_j)|.$$

954 However, due to Line 8, we know that  $B^* = B < T \sum_{p_j \in \text{top}_{P'}(k+1)} |A(p_j)|$ , which gives the  
 955 contradiction with the fact that  $p_i$  is funded.

956 Suppose Equation (S2) or Equation (S3) hold. Then, given our assumption that  $p_i$  is funded, the  
 957 total cost of funded projects is

$$T \cdot \sum_{\substack{p_j \in \text{top}_{P'}(k) \\ p_j \neq p_i}} |A(p_j)| + t'|A(p_i)| >$$

$$T \sum_{p_j \in \text{top}_{P'}(k)} |A(p_j)| = B^* = B,$$

958 Here, the equality is due to the assumption of Equation (S2) or Equation (S3); which yields the  
 959 sought contradiction.

960 *Item 2.* If  $k = |P'|$ , then the statement trivially holds. Otherwise, let us consider  $p^*$  in the light  
 961 of Equation (S1). Due to Line 8, we have that

$$B < T \sum_{p_j \in \text{top}_{P'}(k+1)} |A(p_j)| =$$

$$T \sum_{p_j \in \text{top}_{P'}(k)} (|A(p_j)| + d(p^*)).$$

962 Hence, since all projects in  $\text{top}_{P'}(k)$  are funded,  $p^*$  is not funded. Naturally, if  $p^*$  reports a cost  
 963 bigger than  $d(p^*)$  it will not be funded even more, whereas reporting a cost lower than  $d(p^*)$  results  
 964 in a worse payoff, which finishes the argument for, for Equation (S1). By the condition of Equa-  
 965 tion (S2), it immediately holds that all projects  $\text{top}_{P'}(k)$  use up the whole budget. As a result, again,  
 966  $p^*$  is not funded and, analogously to the case of Equation (S1),  $p^*$  has no profitable deviation. We  
 967 already observed that Item 2 trivially holds for  $k = |P'|$ , which subsumes Equation (S3).

968 *Items 3 and 4.* Observe that assuming strategy  $c$ , all projects in  $P_p$  are considered after all projects  
 969 outside of  $P_p$  in election  $E(c)$ . This is because order  $\succ$  is compliant with the order of considering  
 970 the projects by AV/Cost and our modifications to the initial strategy profile  $c$  do not change the  
 971 order of considering projects (note that we let modified projects be tied for consideration with cost-  
 972 to-approval ratio  $T$ ). Furthermore, note that Algorithm 1 never decreases the reported costs of the  
 973 projects and never considers the same project twice, so the projects in  $P_p$  will never be considered  
 974 before the other ones as a result of further modifications of  $c$ . So, no modification of the profile  $c$   
 975 that increases the costs for projects in  $P_p$  can influence the decision made for projects in  $\text{top}_{P'}(k)$   
 976 or  $\text{top}_{P'}(k+1)$  (depending on whether  $k < |P'|$ ), as the latter are considered by AV/Cost earlier  
 977 than projects in  $P_p$ .

978 *Item 5.* Note that  $P \setminus P_p$  consists only of the following projects: (i) those removed in the foreach  
 979 loop, that is,  $\text{top}_{P'}(k)$ ; (ii)  $p^*$  if  $k < |P'|$ ; and (iii) those removed in Line 18. Regarding the first  
 980 two groups, we have already shown that they do not have a profitable deviation for  $c$ . Let  $\hat{p}$  be  
 981  $\text{top}_{P'}(k)$  if  $k < |P'|$  or, otherwise, let  $\hat{p}$  be  $p^*$ . The last group  $Y$  consists of these projects  $p \in P'$ ,

for which  $\hat{p} \succ p$  and whose  $d(p) > B^*$ . Hence, by  $\succ$ , these projects are considered after all projects in  $\text{top}_{P'}(k) \cup \{\hat{p}\}$ . However, projects in  $\text{top}_{P'}(k)$  are selected to be funded, which leaves exactly  $B^*$  remaining budget. So there is not enough budget left to fund any project in  $Y$ , even if it reports its delivery cost. Hence, no project in  $Y$  has a profitable deviation.

Thus, we have established the base case and we move on to the induction step. Consider  $x > 1$  and the  $x$ -th iteration of the while loop, assuming that the base case claims are met for the  $(x - 1)$ -th iteration. Due to the assumptions for the  $(x - 1)$ -th iteration together with the fact that our algorithm never changes the order  $\succ$  in which AV/Cost considers projects and that it never considers the same project twice, we can ignore all projects processed in previous  $(x - 1)$  iterations of the while loop. Clearly, the ignored projects will have no impact on the current loop iteration except for decreasing the value of the variable  $B^*$  representing the remaining budget. Consequently, the arguments for Items 1 to 4 carry on without changes for the  $x$ th iteration of the while loop. The claim from Item 5, however, needs more attention. Let  $Q^{(x-1)} = P \setminus P_p^{(x-1)}$  be the set of players without profitable deviations after the  $(x - 1)$ -th iteration of the loop. Note that  $P' = P_p^{(x-1)}$ . We denote by  $R$  the set of projects, that are removed from the initial state of  $P_p$  by Lines 13 and 18. That is,  $R$  consists of all these project that—due to Items 1 to 4 and the argument for Item 5 in the base case—have no profitable deviation in  $c$ . So, we have that  $P_p = P' \setminus R$ . We now consider the set  $Q = P \setminus P_p$  of the projects for which we need to show that they have no profitable deviation. Putting the bits together, we observe the following:

$$\begin{aligned} Q = P \setminus P_p &= P \setminus (P' \setminus R) = \\ &= P \setminus (P_p^{(x-1)} \setminus R) = (P \cap R) \cup (P \setminus P_p^{(x-1)}). \end{aligned}$$

Since  $P \cap R = R$ , we obtained that  $Q = R \cup Q^{(x-1)}$  thus showing that the  $x$ -th iteration extends the set of project that do not have a profitable deviation with a collection of project that have no profitable deviation either. As a result, we proved Item 5 for the  $x$ -th iteration. ■

Having proven Claim 1, we completed the argument for the correctness of Algorithm 1 and Theorem 4.4. □

#### 1006 B.4 Proof of Proposition 4.5

1007 *Proof.* Take a natural  $\gamma > 1$  and consider a PB game  $(P, V, B, d)$  where  $P = \{p_1, p_2, p_3\}$ ,  $B = 10$ ,  
1008  $d(p_1) = d(p_2) = 0$ , and  $d(p_3) = 10 - \frac{1}{2\gamma}$ . The voters have plurality ballots such that  $|A(p_1)| =$   
1009  $|A(p_2)| = 1$  and  $A(p_3) = 20\gamma - 1$ . We assume tie-breaking order  $p_1 \succ p_2 \succ p_3$ . We claim that  
1010 strategy profile  $c$  such that  $c(p_1) = c(p_2) = \frac{1}{2\gamma}$  and  $c(p_3) = 10 - \frac{1}{2\gamma}$  is a Phragmén-NE.

1011 First, we see that if the projects reports costs as in  $c$  then Phragmén selects  $p_1$  and  $p_2$ . Indeed, we  
1012 see that at time moment  $\frac{1}{2\gamma}$  the voters supporting each of the projects have exactly as much money  
1013 as is need to purchase them. Due to tie-breaking, the singleton voters supporting  $p_1$  and  $p_2$  buy these  
1014 projects and, then, there is not enough budget left for  $p_3$  and the rule finishes.

1015 Second, we observe that no project can benefit by changing its strategy under  $c$ . Indeed, if either  
1016  $p_1$  or  $p_2$  decreased their cost, they would obtain lower payoff, and if either of them increased their  
1017 cost,  $p_3$  would be funded instead and the payoff of the project that increased its cost would drop to  
1018 zero. If  $p_3$  decreased its cost then it would be selected, but its payoff would become negative (due  
1019 to the delivery cost), and if it increased its cost then its payoff would remain zero. Consequently,  $c$   
1020 is Phragmén-NE.

1021 Finally, we have  $c(p_1) + c(p_2) = \frac{1}{\gamma}$ , and as  $B = 10$ , this is less than  $B/\gamma$ . This concludes the  
1022 proof. □

#### 1023 B.5 Proof of Proposition 4.7

1024 *Proof.* Consider a PB game  $G$  and the strategy profile  $c$  as defined in the statement of the propo-  
1025 sition. We claim that  $c$  is a Phragmén-NE. First, we observe that under  $c$  Phragmén selects all the  
1026 projects, so it is not beneficial for any of them to report a lower cost. On the other hand, if some  
1027 project  $p$  reports a higher cost, this project is not selected by Phragmén. To see why this is the case,  
1028 consider some project  $p$ . Under  $c$ , the total cost of the projects in  $\text{party}(p)$  is  $B \cdot |A(p)|/|V|$ . Since



each of the  $|A(p)|$  voters supporting these projects earns one unit of money per one unit of time, altogether they earn this money in time  $B/|V|$ . This value is independent of  $p$  so, under  $\mathbf{c}$ , the last project of each party is funded at the same time. Hence, if some project increased its price, it would be considered even later and, by that time, there would not be enough budget left. Hence, it is never beneficial to increase a cost and so,  $\mathbf{c}$  is a Phragmén-NE.

It remains to show that  $\mathbf{c}$  is the unique Phragmén-NE for our game. To this end, let  $\mathbf{c}'$  be some arbitrary equilibrium for  $G$ . By Proposition B.1, we know that under  $\mathbf{c}'$  the reported costs of all projects sum up to  $B$  and all projects are funded. Next, we observe that for each project  $p$ , all projects from  $\text{party}(p)$  report the same cost. Indeed, if there were two projects,  $p'$  and  $p'' \in \text{party}(p)$ , such that  $\mathbf{c}'(p') < \mathbf{c}'(p'')$ , then it would be beneficial for  $p'$  to report a higher cost (but below  $\mathbf{c}'(p'')$ ), so that Phragmén would still consider and fund it prior to  $p''$  (for which, then, there would not be enough budget left).

Finally, if there are two projects,  $p$  and  $q$ , such that  $\text{party}(p) \neq \text{party}(q)$ , then, under  $\mathbf{c}'$ , the last project from  $\text{party}(p)$  and the last project from  $\text{party}(q)$  are selected by Phragmén at the same time. Indeed, if this were not the case, then it would be beneficial for the one selected earlier to report higher cost (but so that it still is selected at an earlier time than the other project).

Altogether, the only strategy profile that satisfies the properties described above is  $\mathbf{c}$  as defined in the statement of the proposition.  $\square$

## B.6 Proof of Proposition 4.8

*Proof.* Let our project set be  $P = P' \cup P''$ , where  $P' = \{p'_1, p'_2, p'_3\}$  and  $P'' = \{p''_1, p''_2, p''_3\}$ . Similarly, the set of voters is  $V = V' \cup V''$ , where  $V' = \{v'_1, v'_2, v'_3\}$  and  $V'' = \{v''_1, v''_2, v''_3\}$ . The approvals are as follows (see also Figure 3 for illustration):

1.  $p'_1$  is approved by  $v'_1$ ,  $p'_2$  is approved by  $v'_2$ , and  $p'_3$  is approved by all the voters in  $V'$ .
2. The approvals for the projects in  $P''$  are analogous, except that they are approved by the voters from  $V''$ .

We set the delivery costs  $d$  to be zero for every project, and we set the budget  $B$  to be 1 (the exact value will be irrelevant as we will operate on times when Phragmén reaches the costs of particular projects rather than on directly on these costs). We claim that under Phragmén there are no Nash equilibria for the thus defined PB game  $G = (P, V, B, d)$ .

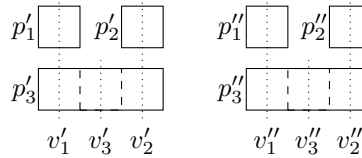

Figure 3: Illustration of the PB game from the proof of Proposition 4.8. The projects are depicted as boxes. Each voter approves those projects that are drawn directly above him or her (and are crossed by the dotted line).

For the sake of contradiction, let us assume that there is Phragmén-NE for  $G$  and let it be  $\mathbf{c}^*$ . For each project  $p \in P$ , let  $\text{time}(p)$  be the time moment (in the sense of the Phragmén rule) when the voters approving  $p$  would collect exactly  $\mathbf{c}^*(p)$  amount of money (assuming that neither of these voters spends it on any other projects in between; hence  $\text{time}(p) = \mathbf{c}^*(p)/|A(p)|$ ). We make the following observations:

1. All projects in  $P$  are funded for the reported costs  $\mathbf{c}^*$  (if some project were not funded, it would prefer to report a small nonzero cost that would be at most equal to  $B$  and that would ensure that Phragmén considers it first).
2. It must be the case that  $\text{time}(p'_1) = \text{time}(p'_2)$ . Indeed, if we had  $\text{time}(p'_1) < \text{time}(p'_2)$  then it would be beneficial for  $p'_1$  to slightly increase its cost, but so that  $\text{time}(p'_1)$  would still be below  $p'_2$ . Then, irrespective in what order are the other projects funded,  $p'_1$ 's voter would collect enough money to purchase  $p'_1$  before the  $p'_2$ 's voter would, and  $p'_1$  would be

1070 bought (since  $p'_2$  would not be selected at this time yet, there would be enough budget left  
 1071 for this). This would contradict that  $c^*$  is an equilibrium. The case  $time(p'_2) < time(p'_1)$   
 1072 is symmetric.

1073 3. It must be the case that  $time(p'_3) = time(p'_1)$  and, hence, also equal to  $time(p'_2)$ . Indeed,  
 1074 if we had  $time(p'_3) < time(p'_1) = time(p'_2)$  then it would be beneficial for  $p'_3$  to report  
 1075 slightly higher cost, so that  $time(p'_3)$  would still be smaller than  $time(p'_1) = time(p'_2)$ ,  
 1076 yet  $p'_3$ 's cost would not have increased by more than the total costs of  $p'_1$  and  $p'_2$ . Then  $p'_3$   
 1077 would still be selected before  $p'_1$  and  $p'_2$  and there would be sufficient amount of budget left  
 1078 for it. This would contradict that  $c^*$  is an equilibrium. On the other hand, if  $time(p'_3) >$   
 1079  $time(p'_1) = time(p'_2)$  then it would be beneficial, e.g., for  $p'_1$  to report slightly higher  
 1080 cost, but ensuring that  $time(p'_1) < time(p'_3)$ . Indeed, if originally we have  $time(p'_1) <$   
 1081  $time(p'_3)$ , then  $p'_1$  is funded before  $p'_3$  by Phragmén. After the increase,  $p'_1$  would still be  
 1082 purchased before  $p'_3$  and, thus, there would still be sufficient budget for it. This would  
 1083 contradict that  $c^*$  is an equilibrium.

1084 4. By reasoning analogous to the one given above, it must be the case that  $time(p''_1) =$   
 1085  $time(p''_2) = time(p''_3)$ .

1086 Given the above observations, we set:

$$time' = time(p'_1) = time(p'_2) = time(p'_3), \text{ and}$$

$$time'' = time(p''_1) = time(p''_2) = time(p''_3).$$

1087 Note that this implies that  $c^*(p'_1) = c^*(p'_2) = time'$ ,  $c^*(p''_1) = c^*(p''_2) = time''$ ,  $c^*(p'_3) = 3 \cdot time'$ ,  
 1088 and  $c^*(p''_3) = 3 \cdot time''$ . We claim that  $time' = time''$ . Indeed, let us consider what happens if  
 1089  $time' < time''$  (the case where  $time'' < time'$  is symmetric). There are two cases to consider  
 1090 (the second case also splits into two).

1091 **Case A** First, let us assume that at least one of  $p'_1$  and  $p'_2$  is preferred to  $p'_3$  by the tie-breaking  
 1092 order (for the sake of specificity, let this be  $p'_1$ ). Then it is beneficial for  $p'_2$  to slightly increase its  
 1093 cost. To see why this is the case, let us consider how Phragmén operates after this increase. At time  
 1094  $time(p'_1) = time(p'_3)$ , the voters have enough funds to purchase either  $p'_1$  or  $p'_3$  (and not enough to  
 1095 purchase  $p'_2$ , who increased its cost). The rule selects  $p'_1$  due to tie-breaking. Consequently, voter  
 1096 1' pays for  $p'_1$  and his or her virtual bank account is reset to zero. Voters 2' and 3' still have  $time'$   
 1097 amount of money. The cost of  $p'_3$  is  $3 \cdot time'$ , so voters in  $N'$  will have collected enough money for  
 1098 it after further  $1/3 \cdot time'$  amount of time. However, if  $p'_2$  increased its cost from  $time'$  to an amount a  
 1099 bit below  $4/3 \cdot time'$  then its voter will have collected this amount earlier, and  $p'_2$  will be purchased  
 1100 before  $p'_3$ . This contradicts the fact that  $c^*$  is an equilibrium.

1101 **Case B'** The second case is that  $p'_3$  is preferred by tie-breaking to both  $p'_1$  and  $p'_2$ . Then it is  
 1102 beneficial for  $p'_3$  to slightly increase its cost. Again, let us consider how Phragmén operates after  
 1103 such a change. If  $p'_3$  is selected prior to both  $p'_1$  and  $p'_2$ , then at time  $time''$  (after the purchase of  
 1104  $p'_3$ ) the voters have the following amounts of money:

1105 1. Voter 3' has  $time''$  amount of money and the remaining voters in  $N'$  have nonzero amounts  
 1106 of money (specifically, each of them has  $time'' - time'$ , because they paid for  $p'_1$  and  $p'_2$  at  
 1107 time  $time'$ ).

1108 2. All the voters in  $V''$  have empty bank accounts.

1109 Hence, only after another  $time''$  amount of time will the voters in  $N''$  have enough money to pur-  
 1110 chase  $p''_1$  and  $p''_2$ . Yet, at this time the voters in  $N'$  would, altogether, have more than  $4 \cdot time''$ . So, if  
 1111  $p'_3$  increased its cost to be between  $3 \cdot time'$  and  $4 \cdot time'$  (which is smaller than  $4 \cdot time''$ ), then  $p'_3$   
 1112 would be funded before  $p''_1$  and  $p''_2$ , and there would be sufficient amount of budget left for this.

1113 **Case B''** On the other hand, if at least one of  $p''_1$  and  $p''_2$  is preferred to  $p''_3$  by tie-breaking at time  
 1114  $time''$ , then both  $p''_1$  and  $p''_2$  are funded at that time (because after one of them is selected due to tie-  
 1115 breaking, the voters in  $V''$  no longer have enough money to purchase  $p''_3$ , but they do have enough  
 1116 for the other one among  $p''_1$  and  $p''_2$ ). Consequently, after  $p''_1$  and  $p''_2$  are purchased at time  $time''$ ,  
 1117 only projects  $p'_3$  and  $p''_3$  are not selected yet and the voters have the following amounts of money:



1118 1. Voter  $v_{3'}$  has  $time''$  amount of money and the remaining voters in  $V'$  have nonzero amounts  
 1119 of money (specifically, each of them has  $time'' - time'$ , because they paid for  $p'_1$  and  $p'_2$  at  
 1120 time  $time'$ ).

1121 2. Voter  $v_{3''}$  has  $time''$  amount of money and the remaining voters in  $V''$  have no money.

1122 Since voters in  $V'$  have, together, more money than those in  $V''$ , but voters from both groups (jointly)  
 1123 earn money at the same rate (as  $|V'| = |V''|$ ), if  $p'_3$  increased its cost to be slightly below that of  $p''_3$ ,  
 1124 it will be funded before  $p'_3$ . Consequently, if  $c^*$  is an equilibrium then we must have  $time' = time''$ .

1125 Finally, it suffices to show that the assumption  $time' = time''$  also leads to no equilibrium. W.l.o.g.,  
 1126 we assume that  $p'_3$  precedes both  $p'_1$  and  $p'_2$  in the tie-breaking order, and that  $p''_3$  precedes both  $p''_1$   
 1127 and  $p''_2$  (if this were not the case, then the arguments given in Case A above would still show that  
 1128  $c^*$  is not an equilibrium). However, now we can see that, e.g., it is beneficial for  $p'_3$  to slightly  
 1129 increase its cost. This follows by the same reasoning as given in Case B'. Hence, we have reached  
 1130 a contradiction. Consequently, under Phragmén there is no Nash equilibrium in our game.  $\square$

## 1131 B.7 Proof of Theorem 4.9

1132 *Proof.* Let  $(P, V, B, d)$  be a MES-Cost PB game.

1133 We provide an iterative algorithm that computes  $c$ . In each iteration, the algorithm fixes selected  
 1134 values of  $c$ , drops the corresponding projects from further consideration and deletes the voters that  
 1135 have no budget left. The algorithm finishes when there is no more projects to consider. Before  
 1136 laying out the details, let us recall that in MES-Cost, each voter gets the equal share of the budget  
 1137 and cannot spend on the projects more than their entitlement.

1138 Our algorithm constructs the strategy  $c$  step by step maintaining the collection  $V'$  of voters to con-  
 1139 sider and the collection  $P'$  of projects to consider. The algorithm starts with setting  $V' = V$ ,  $P' = P$   
 1140 and proceeds as follows:

- 1141 1. Remove from  $P'$  all projects  $p_i \in P'$  for which  $|A(p_i) \cap V'| \cdot B/|V|$  is lower than  $d(p_i)$  or  
 1142 equal to zero and let their strategy be  $c(p_i) = d(p_i)$ .
- 1143 2. For each project  $p_j \in P'$ , let  $\alpha_j = 1/|A(p_j) \cap V'|$  (due to Step 1 we avoid dividing by zero)  
 1144 and let  $p^*$  be the project  $p_j \in P'$  with the minimum  $\alpha_j$ -value (in case of a tie, select the  
 1145 first one in the tie-breaking order).
- 1146 3. Set the strategy  $c(p^*)$  to  $|A(p^*) \cap V'| \cdot B/|V|$ , that is, such that  $p^*$  reports the cost equal to  
 1147 the total budget of its supporters in  $V'$ .
- 1148 4. Remove all supporters of  $p^*$  from  $V'$  and remove  $p^*$  from  $P'$ .
- 1149 5. Repeat Steps 1 to 4 until  $P'$  is empty.

1150 Our algorithm is based on the following useful claim about the decisions made by MES-Cost.

1151 **Claim 2.** *Let us fix some stage of MES-Cost in which every voter with a nonzero budget has the*  
 1152 *same value of budget and let  $V'$  be these voters. Then, for each  $\alpha'$ -affordable project  $p'$  it holds that*  
 1153 *that  $\alpha' = 1/|A(p') \cap V'|$ .*

1154 The claim is implied by the definition of MES-Cost. Observe that if a project  $p$  is  $\alpha$ -affordable, then  
 1155 the voters approving it have enough budget to buy it and  $\alpha$  is the minimum such  $x$  that  $|A(p') \cap V'| \cdot$   
 1156  $x \cdot cost(p) \leq cost(p)$ . The sought  $\alpha$  is then clearly  $1/|A(p') \cap V'|$ .

1157 Let us denote by  $(p_1^*, p_2^*, \dots, p_k^*)$  the projects considered in the respective iterations 1 to  $k$  of  
 1158 Steps 1-4. In what follows we show that in each Nash equilibrium MES-Cost selects exactly  
 1159 projects  $(p_1^*, p_2^*, \dots, p_k^*)$  in the given order and that  $c$  is a Nash equilibrium. We apply induction  
 1160 over the stages of MES-Cost.

1161 For the base case, we argue that  $p_1^*$  has to be selected first by MES-Cost and has to play  $c(c_1^*)$  in  
 1162 every Nash equilibrium. Assume for contradiction that some other project  $p'$  is selected first instead

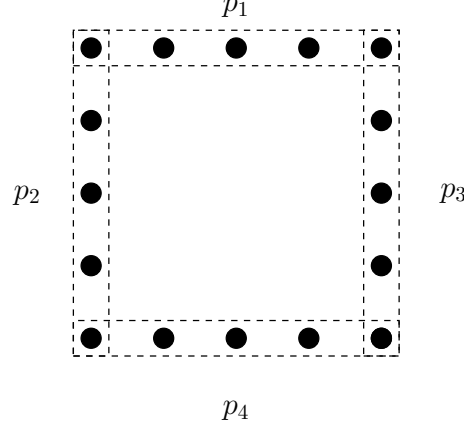

Figure 4: Approval sets of projects  $p_1, p_2, p_3$ , and  $p_4$ . Here, each vertex represents a single voter.

of  $p_1^*$  in a Nash equilibrium. Due to Claim 2 and since MES-Cost selects  $\alpha$ -affordable projects starting from those with the smallest  $\alpha$ , it follows that one of the three holds: (i)  $1/|A(p')| < 1/|A(p_1^*)|$ , (ii)  $1/|A(p')| = 1/|A(p_1^*)|$  and  $p'$  is preferred to  $p_1^*$  by the tie-breaking, or (iii)  $p_1^*$  reports a cost greater than the budget of its supporters. Cases (i) and (ii) yield a clear contradiction to Step 2, which defines  $p_1^*$ . In Case (iii), reporting cost  $c'(p_1^*) = d(p_1^*) + \epsilon \leq B \cdot |A(p_1^*)|/|V|$  (such an  $\epsilon$  always exists due to Step 1) is a profitable deviation for  $p_1^*$ —a contradiction. Knowing that  $p_1^*$  is selected first in every Nash equilibrium, we observe that if  $p_1^*$  reports a cost  $c'(p_1^*) < B \cdot |A(p_1^*)|/|V|$ , then reporting exactly  $c(p_1^*) = B \cdot |A(p_1^*)|/|V|$  is always a profitable deviation, which confirms that in every Nash equilibrium  $p_1^*$ 's strategy is  $c(p_1^*)$  and it is selected first by MES-Cost.

We move on to the inductive step and thus consider stage  $i$  of MES-Cost in which project  $p_i^*$  is selected. Importantly, as we have shown that player  $p_1^*$  has to report cost  $c(p_1^*)$  equal to the total budget of  $p_1^*$  supporters, then we can assume that at the  $i$ -th stage we have only voters who either spend all their budget or who did not spend their budget at all; we denote the latter group by  $V'$ . As a result, Claim 2 holds at the  $i$ -th stage, which we consider. Thanks to this, we apply an analogous exchange argument (pretending that voters outside of  $V'$  do not exist) to that for the base case to show that indeed  $p_i^*$  has to be selected at the  $i$ -th stage. Then, we directly repeat the argument regarding the optimal strategy for  $p_1^*$  applying it to  $p_i^*$ . Eventually, we have shown that in each Nash equilibrium for MES-Cost projects  $(p_1^*, p_2^*, \dots, p_k^*)$  are selected and report, respectively, costs  $(c(p_1^*), c(p_2^*), \dots, c(p_k^*))$ .  $\square$

## B.8 Proof of Theorem 4.10

*Proof.* Let  $(P, V, B, d)$  be a MES-Apr PB game with plurality ballots. In MES-Apr, like in every MES rule, each voter receives  $B/|V|$  money for the whole election process. As each voter approves only one project, each project  $p_i$  can request at most  $M(p_i) = |A(p_i)| \cdot B/|V|$  from its supporters, and will report this cost as they would not spend any money on other projects. Thus, if  $d(p_i) \leq M(p_i)$ , project  $p_i$  reports  $M(p_i)$  and gets selected with its maximum possible cost. Otherwise, if  $d(p_i) > M(p_i)$ ,  $p_i$  cannot be selected with cost covering  $d(p_i)$ , so  $p_i$  reports  $d(p_i)$  and is not selected.  $\square$

## B.9 Proof of Proposition 4.11

*Proof.* We create four projects  $p_1, \dots, p_4$  and 16 voters  $v_1, \dots, v_{16}$ . Project  $p_1$  is approved by voters  $v_1, \dots, v_5$ ; project  $p_2$  by voters  $v_{13}, \dots, v_{16}, v_1$ ; project  $p_3$  by voters  $v_5, \dots, v_9$ ; and project  $p_4$  by voters  $v_9, \dots, v_{13}$ . We set the budget to be some positive integer  $B$  and delivery costs to be  $d \equiv 0$ . Please note that we do not specify tie-breaking as we prove nonexistence of MES-Apr-NE in any tie-breaking.

For a better visualization of the instance, please look at the Figure 4. In particular, one can see that the instance is symmetric (each project is approved by three voters supporting only it and by two voters, one shared with each neighbour).

Now we will show that there is no MES-Apr-NE for this instance. Suppose towards contradiction that some profile  $\mathbf{c}$  is a MES-Apr-NE.

At the beginning, each voter receives  $b = \frac{B}{|V|} = \frac{B}{16}$  money. Therefore, a) no project says cost exceeding  $5b = \frac{5B}{16}$  (otherwise its supporters would never have enough money to buy it, and b) no project says less than  $3b = \frac{3B}{16}$  (as each project has three supporters that contribute only to it, it is nonoptimal to say less than they have). Further, as each project has zero delivery costs, each project must be selected in MES-Apr-NE, otherwise an unselected project could have decreased its cost to 0 and be selected. For this reason,  $\sum_{i=1}^4 \mathbf{c}(p_i) \leq B$ .

For the sake of brevity, for yet-unselected project  $p_i$  in iteration  $j$ , we denote  $\alpha_j(p_i)$  as minimum value such that project  $p_i$  is  $\alpha_j(p_i)$ -affordable according to MES-Apr rule (or infinity, if such a value does not exist). By  $\epsilon \in \mathbb{R}_+$  we mean some very small positive real number such that adding it does not change the given strict inequality sign.

Due to symmetry, w.l.o.g. we can assume that 1) project  $p_1$  says the lowest cost (i.e.,  $\mathbf{c}(p_1) \leq \mathbf{c}(p_2), \mathbf{c}(p_3), \mathbf{c}(p_4)$ ) and wins ties if there is more than more project with this cost as well as 2)  $\mathbf{c}(p_2) \leq \mathbf{c}(p_3)$  and  $p_2$  wins ties with  $p_3$ . If it was not the case, we can shift or rotate projects and perform analogous reasoning.

Before we move on, let us exclude some cases in which  $\mathbf{c}$  cannot be MES-Apr-NE.

We point out that if there is no project of the same cost as  $p_1$ , then  $p_1$  could have increased its cost by some positive number  $\epsilon$  while still being considered first and getting more, so  $\mathbf{c}$  could not have been MES-Apr-NE in this case. Therefore,  $p_1$  has the same cost either as 1)  $p_4$ , or as 2)  $p_2$  (please note  $\mathbf{c}(p_1) = \mathbf{c}(p_3)$  implies  $\mathbf{c}(p_1) = \mathbf{c}(p_2)$  due to assumption that  $\mathbf{c}(p_2) \leq \mathbf{c}(p_3)$ ).

With our assumptions, project  $p_1$  is selected in the first iteration and each of its supporters pays  $\frac{\mathbf{c}(p_1)}{5}$  for  $p_1$ . As  $b - \frac{\mathbf{c}(p_i)}{5} \leq \frac{B}{16} - \frac{\frac{2B}{16}}{5} = \frac{2B}{16} < \frac{\frac{3B}{16}}{5} \leq \frac{\mathbf{c}(p_j)}{5}$  for any  $p_i, p_j \in P$ , voter  $v_1$  has insufficient money to contribute the equal share  $\frac{\mathbf{c}(p_2)}{5}$  to purchase  $p_2$ . Therefore, in the second iteration,  $\alpha_2(p_4) = \frac{\mathbf{c}(p_4)}{5}$ ,  $\alpha_2(p_2) = \frac{\mathbf{c}(p_2) - (b - \frac{\mathbf{c}(p_1)}{5})}{4}$ , and  $\alpha_2(p_3) = \frac{\mathbf{c}(p_3) - (b - \frac{\mathbf{c}(p_1)}{5})}{4} \geq \alpha_2(p_2)$ . Please note that  $\alpha_2(p_2) = \frac{\mathbf{c}(p_2) - (b - \frac{\mathbf{c}(p_1)}{5})}{4} \geq \frac{\mathbf{c}(p_1) - (\frac{B}{16} - \frac{\mathbf{c}(p_1)}{5})}{4} = \frac{6\mathbf{c}(p_1)}{20} - \frac{B}{64} = \frac{4\mathbf{c}(p_1)}{20} + (\frac{2\mathbf{c}(p_1)}{20} - \frac{B}{64}) \geq \frac{\mathbf{c}(p_1)}{5} + (\frac{2 \cdot \frac{3B}{16}}{20} - \frac{B}{64}) = \frac{\mathbf{c}(p_1)}{5} + \frac{6B - 5B}{16 \cdot 20} = \frac{\mathbf{c}(p_1)}{5} + \frac{B}{16 \cdot 20} > \frac{\mathbf{c}(p_1)}{5} = \alpha_1(p_1)$ . Thus, as  $\alpha_2(p_2) > \alpha_1(p_1)$ , project  $p_4$  would regret saying the same cost as project  $p_1$ . Indeed, selecting  $p_1$  in the first iteration significantly increases  $\alpha_2(p_2)$  and  $\alpha_2(p_3)$ , so if  $p_4$  said  $\mathbf{c}(p_4) = \mathbf{c}(p_1)$ , then it would benefit from slightly increasing the cost by  $\epsilon$  (it would still be before  $p_2$ , but it would earn more). For this reason, it cannot be the case that  $\mathbf{c}(p_1) = \mathbf{c}(p_4)$ , so due to the former reasoning we know that  $\mathbf{c}(p_1) = \mathbf{c}(p_2)$  and  $\mathbf{c}(p_1) < \mathbf{c}(p_4)$ .

So we know that:  $\mathbf{c}(p_1) = \mathbf{c}(p_2)$ ,  $\mathbf{c}(p_1) < \mathbf{c}(p_4)$ , and  $\mathbf{c}(p_2) \leq \mathbf{c}(p_3)$ . We have two cases to consider:

- Project  $p_4$  is selected in the second iteration. It means that  $\alpha_2(p_4) \leq \alpha_2(p_2)$ . We observe that it must be  $\alpha_2(p_4) = \alpha_2(p_2)$ , otherwise it would be beneficial for  $p_4$  to slightly increase its cost by  $\epsilon$  in such a way that  $p_4$  is still considered before  $p_2$  and gains more.

In this case, as  $p_2$  and  $p_3$  are approved by disjoint sets of voters and both  $p_1$  and  $p_4$  took the same amount of money from the same number of their supporters, both  $p_2$  and  $p_3$  should request for the same amount of money, that is, all money that their supporters have. Thus  $\mathbf{c}(p_3) = \mathbf{c}(p_2) = 3 \cdot b + (b - \frac{\mathbf{c}(p_1)}{5}) + (b - \frac{\mathbf{c}(p_4)}{5}) = 5b - \frac{\mathbf{c}(p_1)}{5} - \frac{\mathbf{c}(p_4)}{5}$  and  $\mathbf{c}(p_4) = 5 \cdot (5b - \frac{\mathbf{c}(p_1)}{5} - \mathbf{c}(p_2)) = 25b - 5\mathbf{c}(p_2) - \mathbf{c}(p_1)$ .

However, we know that  $\mathbf{c}(p_1) = \mathbf{c}(p_2)$ , so  $\mathbf{c}(p_1) = \mathbf{c}(p_2) = \mathbf{c}(p_3) = 5b - \frac{\mathbf{c}(p_1)}{5} - \frac{\mathbf{c}(p_4)}{5}$ , which implies that  $\mathbf{c}(p_4) = 25b - 5\mathbf{c}(p_2) - \mathbf{c}(p_1) = 25b - 6\mathbf{c}(p_1)$ . Therefore,  $\alpha_2(p_4) = \alpha_2(p_2)$  means that  $\frac{\mathbf{c}(p_4)}{5} = \frac{\mathbf{c}(p_2) - (b - \frac{\mathbf{c}(p_1)}{5})}{4} = \frac{6\mathbf{c}(p_1)}{20} - \frac{b}{4}$ , which is equivalent to  $\frac{25b - 6\mathbf{c}(p_1)}{5} = \frac{6\mathbf{c}(p_1) - 5b}{20} \Rightarrow 100b - 24\mathbf{c}(p_1) = 6\mathbf{c}(p_1) - 5b \Rightarrow 30\mathbf{c}(p_1) = 105b \Rightarrow \mathbf{c}(p_1) = \frac{7b}{2}$ . Then we have  $\mathbf{c}(p_1) = \mathbf{c}(p_2) = \mathbf{c}(p_3) = \frac{7b}{2}$  and  $\mathbf{c}(p_4) = 25b - 6\mathbf{c}(p_1) = 25b - 21b = 4b$ .

Now imagine that project  $p_1$  changes its cost from  $c(p_1) = \frac{7b}{2}$  to  $c'(p_1) = \frac{36b}{10}$ . Naturally, projects  $p_2$  and  $p_3$  are selected in first two iterations so voters  $v_1, \dots, v_5$  supporting  $p_1$  are left with  $b - \frac{c(p_2)}{5}, b, b, b, b - \frac{c(p_3)}{5}$  money respectively and they have  $b - \frac{c(p_2)}{5} + b + b + b + b - \frac{c(p_3)}{5} = 5b - 2 \cdot \frac{7b}{10} = \frac{36b}{10}$  money in total which they can only spend on project  $p_1$  as they disapprove  $p_4$ . So  $p_1$  gets selected with  $c'(p_1) = \frac{36b}{10} > \frac{7b}{2} = c(p_1)$  which indicates that  $c$  could not be MES-Apr-NE.

- Project  $p_2$  is selected in the second iteration. It means that  $\alpha_2(p_2) \leq \alpha_2(p_4)$ . We observe that it must be  $\alpha_2(p_2) = \alpha_2(p_4)$ , otherwise it would be beneficial for  $p_2$  to slightly increase its cost in such a way that  $p_2$  is still considered before  $p_4$  and gains more (please note that even if  $p_3$  would jump before  $p_2$ , it takes money from the disjoint set of voters from  $p_2$ 's supporters, so it does not disprove this argument).

By performing analogous calculations to the previous case and using  $c(p_1) = c(p_2)$  we obtain that  $\alpha_2(p_2) = \frac{c(p_2) - (b - \frac{c(p_1)}{5})}{4} = \frac{6c(p_1)}{20} - \frac{b}{4}$ , so  $\alpha_2(p_4) = \alpha_2(p_2) \Rightarrow \frac{c(p_4)}{5} = \frac{6c(p_1)}{20} - \frac{b}{4} \Rightarrow c(p_4) = \frac{6c(p_1) - 5b}{4}$ .

After  $p_1$  and  $p_2$  are selected, voter  $v_1$  has 0 money left, voters  $v_2, \dots, v_5$  have  $b - \frac{c(p_1)}{5}$  money left, voters  $v_{13}, \dots, v_{16}$  have  $b - \alpha_2(p_2) = b - (\frac{6c(p_1)}{20} - \frac{b}{4}) = \frac{25b - 6c(p_1)}{20}$  money left, and voters  $v_6, \dots, v_{12}$  have  $b$  money left.

We need to consider two cases:

- $p_3$  is selected before  $p_4$ . Then  $c(p_3) = c(p_2)$ , otherwise (if  $c(p_2) < c(p_3)$ )  $p_2$  would increase its cost by  $\epsilon$  in such a way that  $c(p_2) + \epsilon < c(p_3)$  and still be selected in the second iteration, but with more money. Because  $c(p_3) = c(p_2) = c(p_1)$  and the supporters of  $p_2$  and  $p_3$  are disjoint and symmetric, after selecting  $p_3$ , voter  $v_5$  be left with no money whereas voters  $v_6, \dots, v_9$  with  $b - \alpha_3(p_3) = b - \alpha_2(p_2) = \frac{25b - 6c(p_1)}{20}$ . Further, in the fourth iteration, the supporters of  $p_4$  have together  $3b + 2 \cdot \frac{25b - 6c(p_1)}{20} = \frac{30b + 25b - 6c(p_1)}{10} = \frac{55b - 6c(p_1)}{10}$ , so  $p_4$  asks for the money they still have in total.

$$\text{Therefore, } c(p_4) = \frac{6c(p_1) - 5b}{4} = \frac{55b - 6c(p_1)}{10} \Rightarrow 30c(p_1) - 25b = 110b - 12c(p_1) \Rightarrow 42c(p_1) = 135b \Rightarrow c(p_1) = \frac{135b}{42}. \text{ Thus } c(p_4) = \frac{6c(p_1) - 5b}{4} = \frac{6 \cdot \frac{135b}{42} - 5b}{4} = \frac{135b - 35b}{4 \cdot 7} = \frac{100b}{28} = \frac{150b}{42}.$$

Imagine what happens if  $p_1$  increases its cost from  $c(p_1) = \frac{135b}{42}$  to  $c'(p_1) = \frac{156b}{42}$ . Then  $p_2$  gets selected first with cost  $c(p_2) = \frac{135b}{42}$  and each of its supporters pays  $\frac{c(p_2)}{5} = \frac{135b}{42 \cdot 5} = \frac{27b}{42}$ . Next, each of  $p_3$ 's supporters will pay  $\frac{27b}{42}$  to purchase  $p_3$  (voters supporting  $p_2$  and  $p_3$  are disjoint). After that, regardless whether  $p_4$  is selected before  $p_1$  or not, the supporters of  $p_1$  have  $3b + 2 \cdot (b - \frac{27b}{42}) = \frac{3 \cdot 42 + 2 \cdot 15b}{42} = \frac{156b}{42}$ , so the supporters of  $p_1$  have enough money to purchase  $p_1$ . We showed that  $p_1$  could improve its utility by changing its cost, so the proposed  $c$  is not MES-Apr-NE in this case.

- $p_4$  is selected before  $p_3$ . It means that  $\alpha_3(p_4) \leq \alpha_3(p_3)$ . As we know how much money each voter has in the third iteration,  $\alpha_3(p_4) = \frac{c(p_4) - \frac{25b - 6c(p_1)}{20}}{4} = \frac{20c(p_4) - 25b + 6c(p_1)}{80}$  and  $\alpha_3(p_3) = \frac{c(p_3) - \frac{c(p_1)}{5}}{4} = \frac{20c(p_3) - 4c(p_1)}{80}$ . After inserting the exact values we obtain that  $\alpha_3(p_4) \leq \alpha_3(p_3) \Rightarrow \frac{20c(p_4) - 25b + 6c(p_1)}{80} \leq \frac{20c(p_3) - 4c(p_1)}{80} \Rightarrow 20c(p_3) \geq 20c(p_4) - 25b + 10c(p_1) \Rightarrow c(p_3) \geq c(p_4) + \frac{c(p_1)}{2} - \frac{5b}{4}$ . However,  $c(p_3) \geq c(p_4) + \frac{c(p_1)}{2} - \frac{5b}{4} > c(p_4) + \frac{3b}{2} - \frac{5b}{4} = c(p_4) + \frac{b}{4} > c(p_1) + \frac{b}{4} = c(p_2) + \frac{b}{4}$ , so  $c(p_3)$  is significantly greater than  $c(p_2)$ . In other words, even when voter  $v_9$  pays a greater share to buy  $p_4$  and is left with less money than  $\frac{c(p_4)}{5}$ , there is still enough money to purchase  $p_3$ . Therefore,  $p_2$  can increase its cost from  $c(p_2) = c(p_1)$  to  $c(p_3) - \epsilon$  and lose in the second iteration with  $p_4$ , but still be funded before  $p_3$  and obtain more money. For this reason,  $c$  is not MES-Apr-NE.

1293 We showed that in no case MES-Apr-NE exists for this instance. The remaining tie-breaking order  
 1294 are completely analogous due to the instance's symmetry.  
 1295 It means that for the given instance there is no tie-breaking for which MES-Apr-NE exists.  $\square$

## 1296 **B.10 Proof of Theorem 4.12**

1297 *Proof.* We first consider the case of zero delivery costs, as it is simpler. Let  $(P, N, B, d)$  be a  
 1298 MES-Apr PB game with party-list ballots and zero delivery costs.

1299 At the beginning, each voter receives  $B/|V|$  money. In a party-list profile, as every two voters have  
 1300 either the same preferences or the disjoint ones,  $A(p_i) = A(\text{party}(p_i))$ . The total money the sup-  
 1301 porters of  $\text{party}(p_i)$  have is  $M(\text{party}(p_i)) = |A(p_i)| \cdot B/|V| = \frac{|A(p_i)| \cdot B}{|V|}$ . Therefore, the projects in  
 1302  $\text{party}(p_i)$  need to somehow distribute this money between them in such a way that no project would  
 1303 complain and change its cost to obtain better outcome.

1304 Since we have cardinal utilities, the  $\alpha$ -value of project  $p_i$  is initially  $\alpha_1(p_i) = \frac{c(p_i)}{|A(\text{party}(p_i))|}$ . For  
 1305 this reason, MES-Apr will start from the cheapest project in the party to the most expensive one  
 1306 (following tie-breaking order in case of a tie) and equally take the budget from the party supporters  
 1307 to fund the next project unless the cost exceeds the money they still have.

1308 This means that each project should ask for the equal part of the money of party supporters, that it,  
 1309  $\frac{M(\text{party}(p_i))}{|\text{party}(p_i)|}$ . The project asking for more money would be moved to the end of the order when its  
 1310 supporters have insufficient money to fund it, so no project would increase its cost. Asking for less  
 1311 money is pointless if it is already funded.

1312 For this reason, for the profile  $c$  where each project says  $c(p_i) = \frac{M(\text{party}(p_i))}{|A(\text{party}(p_i))|}$ , we obtain  
 1313 MES-Apr-NE.

1314 Next we move to the case with arbitrary delivery costs. Let  $(P, V, B, d)$  be a MES-Apr PB game  
 1315 with party-list ballots. Recall that at the beginning each voter receives  $B/|V|$  money. Then, the total  
 1316 money the supporters of  $\text{party}(p_i)$  have is  $M(\text{party}(p_i)) = |A(p_i)| \cdot B/|V| = \frac{|A(p_i)| \cdot B}{|V|}$ .

1317 Let  $\succ$  be the A/D tie-breaking order from the theorem statement. Note that for the case of party-list  
 1318 ballots  $\succ$  orders the projects within the same party nondescendingly by the delivery costs. That is,  
 1319 within the same party cheaper projects preferred to the more expensive ones. In case of two projects  
 1320 within the same party with equal delivery costs, we assume without loss of generality that the project  
 1321 with a lower index is preferred (we can always relabel projects to achieve this condition). Notably,  
 1322  $\succ$  does not impose any specific order with respect to the delivery costs over any two projects of two  
 1323 different parties.

1324 Since in MES-Apr we consider cardinal utilities, the  $\alpha$ -value of project  $p_i$  is at the beginning:  
 1325  $\alpha_1(p_i) = \frac{c(p_i)}{|A(\text{party}(p_i))|}$ . For this reason, MES-Apr will start from the cheapest project in the party  
 1326 to the most expensive one (following the specified tie-breaking order in case of a tie) and equally  
 1327 take the budget from the party supporters to fund the next project unless the cost exceeds the money  
 1328 they still have.

1329 Now we have to consider two cases:

- 1330 • The last in the tie-breaking order project  $p_j \in \text{party}(p_i)$  has delivery cost  $d(p_j)$  not ex-  
 1331 ceeding  $\frac{M(\text{party}(p_i))}{|\text{party}(p_i)|}$ . Note that this case is similar to our case with zero delivery costs  
 1332 that we started this proof with, i.e., each project submits  $\frac{M(\text{party}(p_i))}{|\text{party}(p_i)|}$ , gets funded, and no  
 1333 project benefits from changing its cost.
- 1334 • The last in the tie-breaking order project  $p_j \in \text{party}(p_i)$  has delivery cost  $d(p_j)$  exceeding  
 1335  $\frac{M(\text{party}(p_i))}{|\text{party}(p_i)|}$ . In such a case, if every project submitted cost  $d(p_j)$ , then  $p_j$  would not be  
 1336 selected as it is last in the tie-breaking order and cannot profitably decrease its cost. For  
 1337 this reason, we set the cost of  $p_j$  to be  $d(p_j)$ , remove  $p_j$  from consideration, and repeat this  
 1338 procedure as long as the product of the number of yet-remained projects and the delivery

cost of the last in the tie-breaking project exceeds  $M(\text{party}(p_i))$ . Suppose now that the procedure stopped and project  $p_k$  was the last removed one. Then all  $y$  yet-remaining projects would say cost  $\min(M(\text{party}(p_i))/y, d(p_k))$  and be given this funding. Saying more than  $d(p_k)$  would result in being overtaken by project  $p_k$  and thrown out of the outcome due to insufficient budget. Saying more than  $M(\text{party}(p_i))/y$  would result in getting the last among remaining projects and asking for more money than left in the budget at that timestamp.

The combination of  $c$  profiles calculated in the above way for all parties is a MES-Apr-NE for the given instance.  $\square$

**Example B.2.** Take a PB game  $G$  with one voter approving projects  $p_1, p_2$ , and  $p_3$ . Let  $B = 6$ ,  $d(p_1) = 3$ ,  $d(p_2) = 0$ , and  $d(p_3) = 0$ , with  $p_1 \succ p_2 \succ p_3$ . There is no MES-Apr-NE in  $G$  (the full proof is in the appendix and we give a sketch): Suppose that  $c$  is an NE. Then  $c(p_1) \geq 3$  (otherwise, as it is selected,  $p_1$  improves by reporting 3) and  $c(p_2), c(p_3) < c(p_1) = 3 = B/2$  (otherwise, the more expensive one is not funded). Since  $c(p_2) + c(p_3) < B$ ,  $p_2$  may report  $(c(p_2) + c(p_3))/2$  and still be selected, so  $c$  is not an NE.

Suppose towards contradiction that  $c$  is such an equilibrium. W.l.o.g., let  $c(p_1) \geq d(p_1) = 3$ . Otherwise, if  $p_1$  would be selected under these costs (and, hence, received a negative payoff), then it would prefer to report  $d(p_1)$  and receive utility 0. If it was not funded under  $c$ , then  $(c_{-1}, d(p_1))$  also would be an equilibrium. Next, we observe that  $c(p_1) = 3$ . Indeed, if  $p_1$  reported a value greater than 3, then one of the projects could obtain a better payoff: If  $p_2$  or  $p_3$  reported a value greater or equal to  $c(p_1)$ , then it would benefit by reporting a smaller one; if  $p_2$  and  $p_3$  reported values that sum up to more than  $B$ , then at least one of them would benefit by reporting a smaller cost, and if they reported values that sum up to at most  $B$  then either (a) one of them would benefit by reporting a larger cost, or (b) if they both reported 3,  $p_1$  would benefit by reporting 3. Hence, we have that  $c(p_1) = 3 = B/2$ . Then, both  $c(p_2) > 0$  and  $c(p_3) > 0$  (the project reporting 0 would benefit by reporting a larger number). Further, we have that  $c(p_2) < c(p_1)$  and  $c(p_3) < c(p_1)$ . Indeed, if either  $p_2$  or  $p_3$  reported value greater or equal to  $c(p_1)$  then it would not be selected and, hence, would benefit by reporting a smaller cost. So,  $c(p_2) + c(p_3) < B$ . But then either of them would benefit by reporting a higher cost (so that the sum of their costs would not exceed  $B$ ). Thus  $c$  is not a MES-Apr-NE.

## B.11 Proof of Theorem 4.13

*Proof.* Our example is in fact the example from Proposition 4.8 narrowed to prim voters and projects.

We have three voters  $v_1, v_2$ , and  $v_3$  as well as three projects  $p_1, p_2$ , and  $p_3$ . Projects  $p_1$  and  $p_2$  are approved by, respectively, voters  $v_1$  and  $v_2$ , while project  $p_3$  is approved by all three voters. We set the budget to be some positive integer denoted as  $B$  and the delivery costs of these projects to be  $d \equiv 0$ . We set the tie-breaking between projects to be  $p_1 \succ p_2 \succ p_3$ . For the sake of brevity, for yet-unselected project  $p_i$  in iteration  $j$ , we denote  $\alpha_j(p_i)$  as minimum value such that project  $p_i$  is  $\alpha_j(p_i)$ -affordable according to MES-Apr rule (or infinity, if such a value does not exist).

Let  $(c(p_1) = \frac{7B}{36}, c(p_2) = \frac{8B}{36}, c(p_3) = \frac{21B}{36})$  be the costs the projects say. We will show that it is MES-Apr-NE.

At the beginning, each of three voters receives  $\frac{B}{3} = \frac{12B}{36}$  money.

In the first iteration,  $\alpha_1(p_1) = \frac{7B/36}{1} = \frac{7B}{36}$ ,  $\alpha_1(p_2) = \frac{8B/36}{1} = \frac{8B}{36}$ ,  $\alpha_1(p_3) = \frac{21B/36}{3} = \frac{7B}{36}$ , so  $p_1$  and  $p_3$  are tied, while  $p_2$  has greater  $\alpha$ -value and is skipped for now. Thus, due to tie-breaking, we select  $p_1$  and voter  $v_1$  pays  $\frac{7B}{36}$  for  $p_1$ .

In the second iteration,  $v_1$  has  $\frac{5B}{36}$  money while both  $v_2$  and  $v_3$  have  $\frac{12B}{36}$ . Thus, since the budget of  $v_2$  did not change,  $\alpha_2(p_2) = \alpha_1(p_2) = \frac{8B}{36}$ . In order to purchase  $p_3$ , voter  $v_1$  would need to spend all left money whereas  $v_2$  and  $v_3$  would need to pay more to make up  $v_1$ 's insufficient money. More precisely,  $\alpha_2(p_3) = \frac{21B/36 - 5B/36}{2} = \frac{16B/36}{2} = \frac{8B}{36}$ . So projects  $p_2$  and  $p_3$  are tied and we select  $p_2$  due to tie-breaking (by taking money from  $v_2$ ).



1389 Finally, in the third iteration, we will select  $p_3$  as its supporters have  $\frac{5B}{36} + \frac{4B}{36} + \frac{12B}{36} = \frac{21B}{36} = c(p_3)$ ,  
 1390 all voters will use all their money for it.

1391 We showed that each project is selected with the proposed costs so no project benefits from lowering  
 1392 its costs. Next,  $p_3$  will not increase its cost as its supporters would not have enough money to buy  
 1393 it in the last iteration. Further,  $p_2$  will not increase its cost as it would lose with  $p_3$  in the second  
 1394 iteration and its only supporter  $v_2$  would pay  $\frac{8B}{36}$  for  $p_3$ , leaving insufficient  $\frac{4B}{36}$  for  $p_2$ . Analogously,  
 1395  $p_1$  will not increase its cost as it would lose with  $p_3$  in the first iteration and its only supporter  $v_1$   
 1396 would pay  $\frac{7B}{36}$  for  $p_3$ , leaving insufficient  $\frac{5B}{36}$  for  $p_1$ .

1397 For this reason,  $\mathbf{c} = (c(p_1) = \frac{7B}{36}, c(p_2) = \frac{8B}{36}, c(p_3) = \frac{21B}{36})$  is a MES-Apr-NE for the given  
 1398 instance.

1399 One can show in an analogous way that  $\mathbf{c}' = (c'(p_1) = \frac{8B}{36}, c'(p_2) = \frac{7B}{36}, c'(p_3) = \frac{21B}{36})$  is also  
 1400 MES-Apr-NE for the given instance.  $\square$

## 1401 B.12 Proof of Theorem 6.1

1402 Let us begin by introducing additional notation. In a *cost-interval PB game*  $G^+ = (P, V, B)$  we  
 1403 associate each voter  $v$  with an *approval function*  $A : V \times P \rightarrow 2^{[0, B]}$ , with  $A(v, p)$  specifying how  
 1404 costly can a project  $p$  be for  $v$  to approve it. For simplicity, we assume that  $A(v, p)$  is a possibly  
 1405 empty interval. We say that a voter  $v$  *potentially supports* a project  $p$  if  $A(v, p) \neq \emptyset$ . Then, for  
 1406 a strategy profile  $\mathbf{c}$ , the corresponding PB election  $E(\mathbf{c}) = (P, V, B, \mathbf{c})$  is such that each voter  
 1407  $v$  approves a project  $p \in P$  if  $\text{cost}(p) \in A_v(p)$ . Then, the payoff function and Nash equilibria  
 1408 are defined for cost-interval PB games analogously to PB games. We now showcase examples  
 1409 witnessing the result for particular voting rules.

1410 **MES-Cost.** Consider the following cost-interval PB game  $G$ . Take the set of projects  $P =$   
 1411  $\{p_1, p_2\}$ , as well as the set of voters  $V = \{v_1, v_2, v_3, v_4\}$ . Further, we let  $A(v_1, p_1) = A(v_2, p_1) =$   
 1412  $[8, 12]$ ,  $A(v_3, p_1) = A(v_4, p_1) = [0, 4]$ ,  $A(v_1, p_2) = [4, 8]$ , and  $A(v_2, p_2) = A(v_3, p_2) =$   
 1413  $A(v_4, p_2) = [0, 3]$ . Finally, let  $B = 16$ .

1414 Suppose that there exists a strategy profile  $\mathbf{c}$  that is a MES-Cost-NE. Let us then consider the  
 1415 following, exhaustive cases:

- 1416 1.  $\mathbf{c}(p_1) \in (4, 8) \cup (12, 16]$ . Then,  $p_1$  is not funded, while for  $\mathbf{c}(p_1) = 1$ ,  $p_1$  is funded  
 1417 regardless of  $\mathbf{c}(p_2)$ .
- 1418 2.  $\mathbf{c}(p_1) \in (8, 12]$  Then,  $p_1$  is not funded, and hence could benefit from lowering its cost.
- 1419 3.  $\mathbf{c}(p_1) = 8$ . Then, we note that as  $\mathbf{c}$  is an NE,  $\mathbf{c}(p_2) = 3$ , as then  $p_2$  is funded but would  
 1420 not be selected for  $(8, \mathbf{c}'(p_2))$  with  $\mathbf{c}'(p_2) > 3$ . But then,  $p_1$  is not funded under  $\mathbf{c}$ , while it  
 1421 would benefit from submitting  $\mathbf{c}'(p_1) = 4$ .
- 1422 4.  $\mathbf{c}(p_1) \in [0, 4]$ . Then,  $\mathbf{c}(p_2) = 4$ , as then  $p_2$  is funded under  $\mathbf{c}$  but would not be under  
 1423  $(\mathbf{c}(p_1), \mathbf{c}'(p_2))$ , for any  $\mathbf{c}'(p_2) > 4$ . However, in that case  $p_1$  would benefit from raising  
 1424 their cost to 8.

1425 It follows that there is no MES-Cost-NE in  $G$ .

1426 **BasicAV.** Consider the following cost-interval PB game  $G$ . Take the set of projects  $P = \{p_1, p_2\}$ ,  
 1427 where  $p_1 \succ p_2$ , as well as the set of voters  $V = \{v_1, v_2, v_3, v_4, v_5\}$ . Further, we let  $A(v_1, p_1) =$   
 1428  $[5, 9]$ ,  $A(v_2, p_1) = [3, 7]$ ,  $A(v_3, p_2) = [4, 8]$ ,  $A(v_4, p_2) = [5, 7]$ , and  $A(v_5, p_2) = [1, 6]$  so this is a  
 1429 plurality profile. Finally, let  $B = 10$ .

1430 Suppose that there exists a strategy profile  $\mathbf{c}$  that is a BasicAV-NE. Let us then consider the follow-  
 1431 ing, exhaustive cases:

- 1432 1.  $\mathbf{c}(p_1) \in [0, 3) \cup (9, 10]$ . Then,  $p_1$  is not funded but would benefit from submitting  $\mathbf{c}'(p_2) =$   
 1433  $3$ , as then  $p_1$  is always selected.
- 1434 2.  $\mathbf{c}(p_1) \in [3, 4) \cup (7, 9]$ . Then, we note that as  $\mathbf{c}$  is an NE,  $\mathbf{c}(p_2) = 7$ , as then  $p_2$  is funded  
 1435 but would not be selected for  $(\mathbf{c}(p_1), \mathbf{c}'(p_2))$  with  $\mathbf{c}'(p_2) > 7$ . But then,  $p_1$  is not funded  
 1436 under  $\mathbf{c}$ , while it would benefit from submitting  $\mathbf{c}'(p_1) = 7$ .

1437 3.  $c(p_1) \in [4, 7]$ . Then,  $c(p_2) = 6$ , as then  $p_2$  is funded under  $c$  but would not be under  
 1438  $(c(p_1), c'(p_2))$ , for any  $c'(p_2) > 6$ . However, in that case  $p_1$  would benefit from reducing  
 1439 their cost to 4.

1440 It follows that there is no BasicAV-NE in  $G$ .

1441 **AV/cost.** Consider the following cost-interval PB game  $G$ . Take the set of projects  $P = \{p_1, p_2\}$ ,  
 1442 where  $p_2 \succ p_1$ , as well as the set of voters  $V = \{v_1, v_2, v_3, v_4\}$ . Further, we let  $A(v_1, p_1) = [4, 9]$ ,  
 1443  $A(v_2, p_1) = A(v_3, p_1) = [8, 9]$ , and  $A(v_4, p_2) = [2, 6]$ , so this is a plurality profile. Finally, let  
 1444  $B = 10$ .

1445 Suppose that there exists a strategy profile  $c$  that is a AV/Cost. Let us then consider the following,  
 1446 exhaustive cases:

- 1447 1.  $c(p_1) \in [0, 4) \cup (9, 10]$ . Then,  $p_1$  is not funded but would benefit from submitting  $c'(p_2) =$   
 1448 5, as then  $p_1$  is always selected.
- 1449 2.  $c(p_1) \in [8, 9]$ . Then, we note that as  $c$  is an NE,  $c(p_2) = c(p_1)/3$ , as then  $p_2$  is funded but  
 1450 would not be selected for  $(c(p_1), c'(p_2))$  with  $c'(p_2) > c(p_1)/3$ . But then,  $p_1$  is not funded  
 1451 under  $c$ , while it would benefit from submitting  $c(p_1) \in [4, 3 \cdot c(p_2))$ .
- 1452 3.  $c(p_1) \in [5, 8]$ . Then,  $c(p_2) = \min(c(p_1), 6) \in [5, 6]$ , as then  $p_2$  is funded under  $c$  but  
 1453 would not be under  $(c(p_1), c'(p_2))$ , for any  $c'(p_2) > \min(c(p_1), 6)$ . However, in that case  
 1454  $p_1$  would benefit from raising their cost to 9.
- 1455 4.  $c(p_1) \in [4, 5]$ . Then,  $c(p_2) = \min(10 - c(p_1), 6) \in [5, 6]$ , as then  $p_2$  is funded under  $c$   
 1456 but would not be under  $(c(p_1), c'(p_2))$ , for any  $c'(p_2) > \min(10 - c(p_1), 6)$ . However,  
 1457  $p_1$  would benefit from raising their cost to 9.

1458 It follows that there is no AV/Cost in  $G$ .

1459 **Phragmén.** The claim follows by the example for AV/Cost, as Phragmén and AV/Cost are equiva-  
 1460 lent for plurality elections.

1461 **MES-Apr.** Consider the following cost-interval PB game  $G$ . Take the set of projects  $P =$   
 1462  $\{p_1, p_2\}$ , as well as the set of voters  $V = \{v_1, v_2, v_3\}$ . Also, let  $A(v_1, p_1) = A(v_1, p_2) = [12, 18]$ .  
 1463 Then, let  $A(v_2, p_1) = A(v_2, p_2) = [6, 12]$  and the approval function of  $v_3$  be the same as the ap-  
 1464 proval function of  $v_2$ . Finally, we let  $B = 18$  and assume zero delivery costs. It's clear that each  
 1465 voter received  $B/3 = 6$  money units at the beginning of the algorithm regardless of the costs of the  
 1466 projects.

1467 Suppose that there is a MES-Apr-NE  $c = (c_1, c_2)$  for  $G$ . First, we can see that each of the projects is  
 1468 funded with the cost set to 6 regardless of the cost submitted by the other proposer. So, both projects  
 1469 are funded under  $(c_1, c_2)$ . Hence, we notice that  $c_1 \in [6, 12]$  and  $c_2 \in [6, 12]$ , as otherwise, either  
 1470 one of the projects would submit cost higher than 12 and be supported by only voter (whose budget  
 1471 is 6), or submit a cost lower than 6 and not be supported by anyone. So, in both scenarios one of the  
 1472 project would not be funded. Let us then consider the following exhaustive cases:

- 1473 1.  $c_1 = 12$  or  $c_2 = 12$ . Without loss of generality, let  $c_1 = 12$ . Then, we see that  $c_2 = 8$  or  
 1474  $c_2 = 12$ . Otherwise, if  $c_2 \in (8, 12)$ , then  $p_2$  would not be funded and if  $c_2 < 8$ , then  $p_2$   
 1475 would be funded under  $(12, c_2 + \epsilon)$ , for some  $\epsilon > 0$ . But then, one of the projects is not  
 1476 funded under  $(c_1, c_2)$ , as  $c_1 + c_2 > B$ . Hence, according to previous observations,  $(c_1, c_2)$   
 1477 is not a MES-Apr-NE.
- 1478 2.  $c_1 \in [6, 12)$  and  $c_2 \in [6, 12)$ . Observe that for this cost range, only voters  $v_2$  and  $v_3$   
 1479 may pay for these projects, while having 12 money units in total. Then, we observe that  
 1480  $c_1 + c_2 \leq 12$ , as otherwise one of the projects would not be funded. Moreover,  $c_1 = c_2$ ,  
 1481 as otherwise the proposer  $p_i$  submitting the lower cost would benefit from increasing  $c_i$ .  
 1482 Hence, in this case  $c_1 = c_2 = 6$ . But then  $p_1$  would also be funded under  $(12, 6)$ , and  
 1483 hence  $(c_1, c_2)$  is not an MES-Apr-NE.

1484 It follows that there is no MES-Apr-NE in  $G$ .

Table 3: Additional PB instances that we analyze in the experiments. Vote Len. means the average number of approvals in a ballot. Rule indicates the PB rule that was used in the original election.

| Instance | $ P $ | $ V $ | Budget  | Vote Len. | Rule    |
|----------|-------|-------|---------|-----------|---------|
| Bemowo   | 83    | 5181  | 4854279 | 10.8      | BasicAV |
| Bielany  | 98    | 4957  | 5258802 | 9.8       | BasicAV |
| Wilanow  | 35    | 2359  | 1516962 | 9.59      | BasicAV |
| Wlochy   | 43    | 2221  | 1719224 | 9.51      | BasicAV |

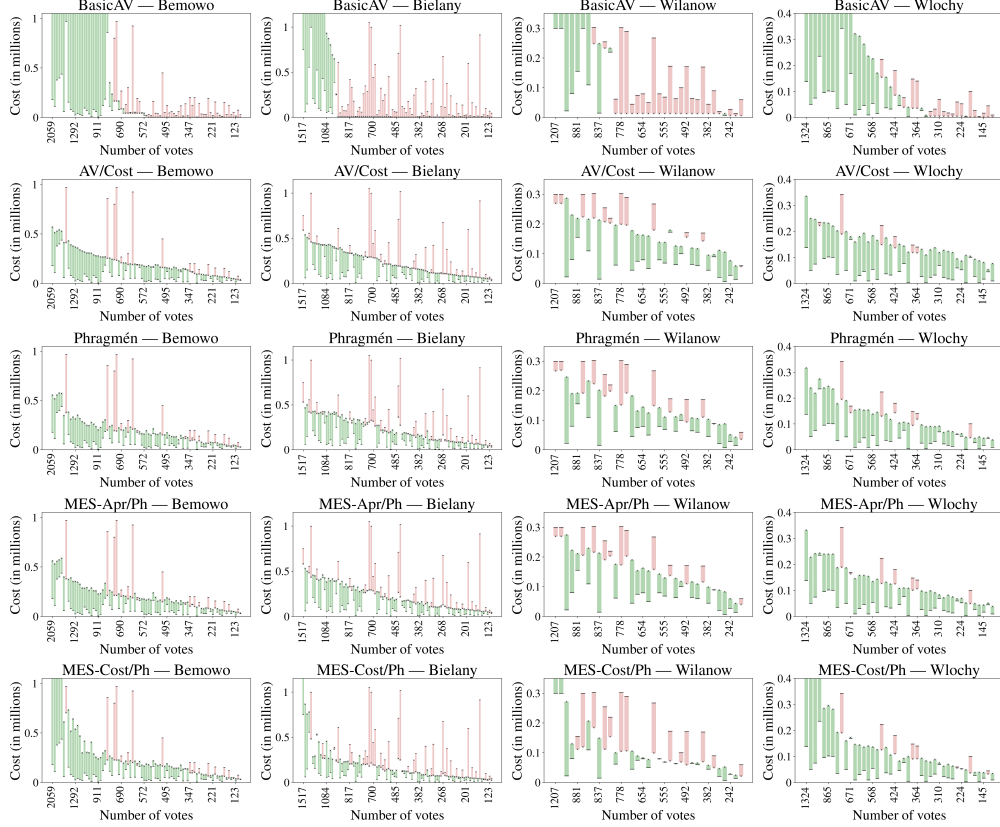

Figure 5: Winning (green bars) and losing (red bars) margins in real-life PB. Projects ordered by decreasing approval scores (on the  $x$ -axis) are represented by bars. Ticks and crosses show, respectively, the original and best response costs.

## C Additional Experimental Results

Here, we present experimental results for four additional PB instances held in 2022 in different districts of Warsaw, Poland, i.e., in Bemowo, Bielany, Wilanow, and Wlochy. Details regarding these datasets are presented in Table 3. In Figure 5 we present the winning and losing margins in additional real-life PB instances, and in Figure 6 we present the strategy profiles after 10'000 iterations of our dynamics.

Moreover, in Table 4 we present comparison of the original winning and losing margins and those after 10'000 iterations. We observe that in most cases the size of the margins drastically decreased.

## D Dynamics With 80% Delivery Costs

In Figure 7 we show the results of the dynamics from Section 5.2 for the case where each project has delivery cost equal to the 80% of the cost it had in the original instance. We see that aside from

|               | Rule        | Original Margins |           | 10000 it. Margins |           |
|---------------|-------------|------------------|-----------|-------------------|-----------|
|               |             | Winning          | Losing    | Winning           | Losing    |
| Bemowo        | BasicAV     | 1830 ± 1283      | 122 ± 182 | 0                 | 24 ± 37   |
|               | AV/Cost     | 150 ± 104        | 225 ± 257 | 1 ± 3             | 0.2 ± 0.1 |
|               | Phragmén    | 141 ± 91         | 220 ± 261 | 3 ± 3             | 0.9 ± 0.7 |
|               | MES-Apr/Ph  | 150 ± 95         | 223 ± 264 | 3 ± 4             | 2 ± 2     |
|               | MES-Cost/Ph | 250 ± 323        | 205 ± 244 | 1 ± 2             | 1 ± 2     |
| Bielany       | BasicAV     | 1447 ± 1355      | 218 ± 205 | 0                 | 2 ± 2     |
|               | AV/Cost     | 157 ± 128        | 171 ± 150 | 0.9 ± 2           | 0.2 ± 0.3 |
|               | Phragmén    | 146 ± 121        | 176 ± 154 | 4 ± 3             | 0.9 ± 0.9 |
|               | MES-Apr/Ph  | 148 ± 121        | 176 ± 151 | 3 ± 4             | 1 ± 2     |
|               | MES-Cost/Ph | 172 ± 193        | 180 ± 154 | 3 ± 6             | 3 ± 4     |
| Wesola        | BasicAV     | 265 ± 249        | 64 ± 51   | 0                 | 0         |
|               | AV/Cost     | 86 ± 27          | 55 ± 31   | 0.3 ± 0.4         | 0.2 ± 0.1 |
|               | Phragmén    | 69 ± 31          | 51 ± 37   | 2 ± 1             | 0.9 ± 1   |
|               | MES-Apr/Ph  | 79 ± 33          | 43 ± 37   | 2 ± 1             | 0.7 ± 0.7 |
|               | MES-Cost/Ph | 70 ± 56          | 65 ± 45   | 0.1 ± 0.1         | 0.4 ± 0.5 |
| Wilanow       | BasicAV     | 536 ± 399        | 87 ± 80   | 0                 | 0         |
|               | AV/Cost     | 87 ± 59          | 51 ± 34   | 2 ± 2             | 0.1 ± 0.0 |
|               | Phragmén    | 77 ± 52          | 66 ± 41   | 2 ± 2             | 0.3 ± 0.2 |
|               | MES-Apr/Ph  | 89 ± 56          | 58 ± 37   | 2 ± 1             | 0.7 ± 0.8 |
|               | MES-Cost/Ph | 79 ± 120         | 95 ± 64   | 1 ± 2             | 2 ± 4     |
| Wlochy        | BasicAV     | 532 ± 524        | 46 ± 35   | 0                 | 0         |
|               | AV/Cost     | 107 ± 49         | 56 ± 48   | 0.8 ± 1.0         | 0.1 ± 0.1 |
|               | Phragmén    | 83 ± 52          | 62 ± 42   | 3 ± 3             | 2 ± 1     |
|               | MES-Apr/Ph  | 85 ± 53          | 64 ± 45   | 2 ± 2             | 1 ± 1     |
|               | MES-Cost/Ph | 138 ± 186        | 56 ± 46   | 0.2 ± 0.2         | 0.4 ± 0.5 |
| Kleine Wereld | BasicAV     | 117 ± 78         | 14 ± 11   | 0                 | 1.0 ± 0.0 |
|               | AV/Cost     | 12 ± 8           | 12 ± 12   | 0.1 ± 0.1         | 0.1 ± 0.0 |
|               | Phragmén    | 10 ± 8           | 10 ± 11   | 0.5 ± 0.6         | 0.2 ± 0.2 |
|               | MES-Apr/Ph  | 11 ± 7           | 11 ± 11   | 0.4 ± 0.6         | 0.2 ± 0.2 |
|               | MES-Cost/Ph | 26 ± 34          | 11 ± 11   | 2 ± 1             | 0.1 ± 0.0 |

Table 4: Comparison of winning and losing margins in the original elections and after 10000 iterations of the game. (All the values are in 1000 PLN\EUR). In each entry the first value denotes the average and the second value (i.e., the one after  $\pm$  sign) denotes the standard deviation.

1496 fairly expensive projects, whose cost could not drop below the delivery cost, the overall behavior  
1497 of our rules is as with zero delivery costs.

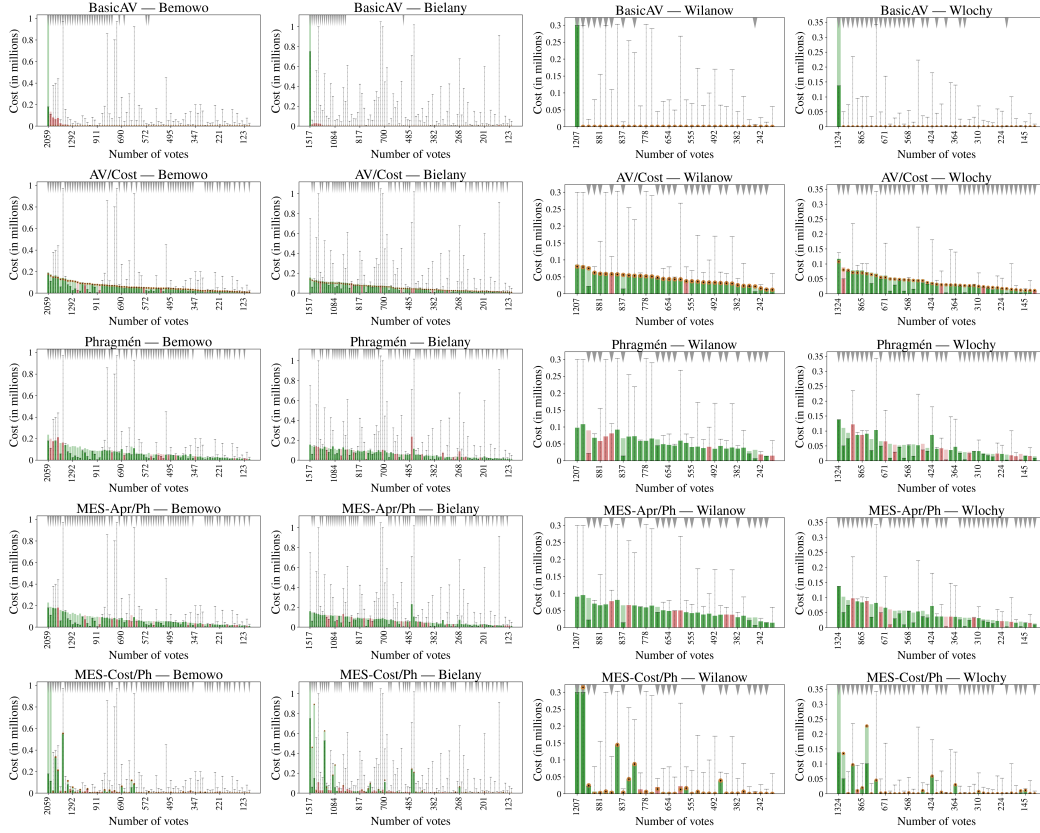

Figure 6: Strategy profiles after 10 000 iterations of our dynamics. Projects ordered by decreasing approval scores ( $x$ -axis). Final projects' costs shown by bars; the original costs shown as dashed lines. Red and green bars indicate, respectively, losing and winning projects; brighter parts are the increases over the original cost. The triangles at the top mark the originally winning projects. Brown circles denote the equilibrium costs (for rules for which we can compute it).

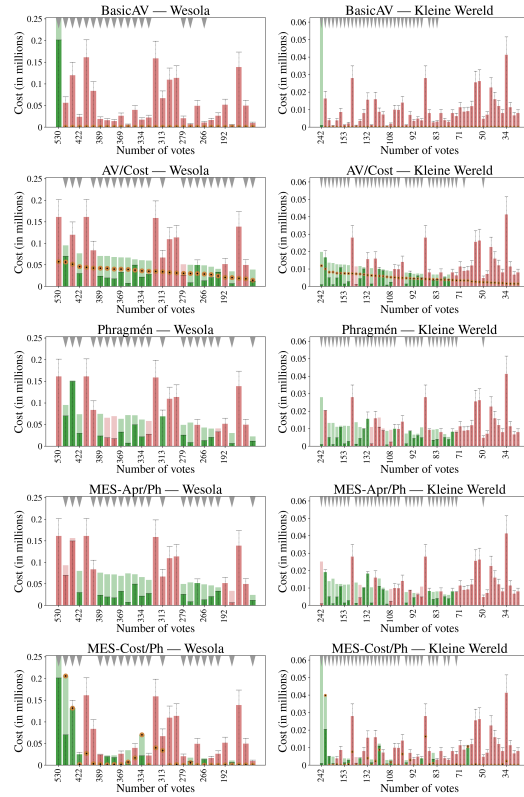

Figure 7: Strategy profiles after 10 000 iterations of our dynamics. for the case where each project has delivery cost equal to 80% of its original cost in the instance. Projects ordered by decreasing approval scores ( $x$ -axis). Final projects' costs shown by bars; the original costs shown as dashed lines. Red and green bars indicate, respectively, losing and winning projects; brighter parts are the increases over the original cost. The triangles at the top mark the originally winning projects. Brown circles denote the equilibrium costs (for rules for which we can compute it).
